# Supplementary material
Source: publisher figshare collection journal article supplement (https://acs.figshare.com/ndownloader/files/14428622)
Supplement: Supplementary file 1 [file 14428622]

## Supplemental Information

### Effects of Cu(II) on the Formation and Orientation of an Arachidic Acid Langmuir-Blodgett Film

Briana A. Capistran, and G. J. Blanchard\*  
Michigan State University  
Department of Chemistry  
578 S. Shaw Lane  
East Lansing, MI 48824

|                                                   |   |
|---------------------------------------------------|---|
| 1. BAM images from pH dependence experiments..... | 2 |
| 2. Mathematical model workflow.....               | 5 |
| 3. Ellipsometry thickness data.....               | 8 |

---

\*Author to whom correspondence should be addressed. Email: [blanchard@chemistry.msu.edu](mailto:blanchard@chemistry.msu.edu)

## 1. BAM images from pH dependence experiments

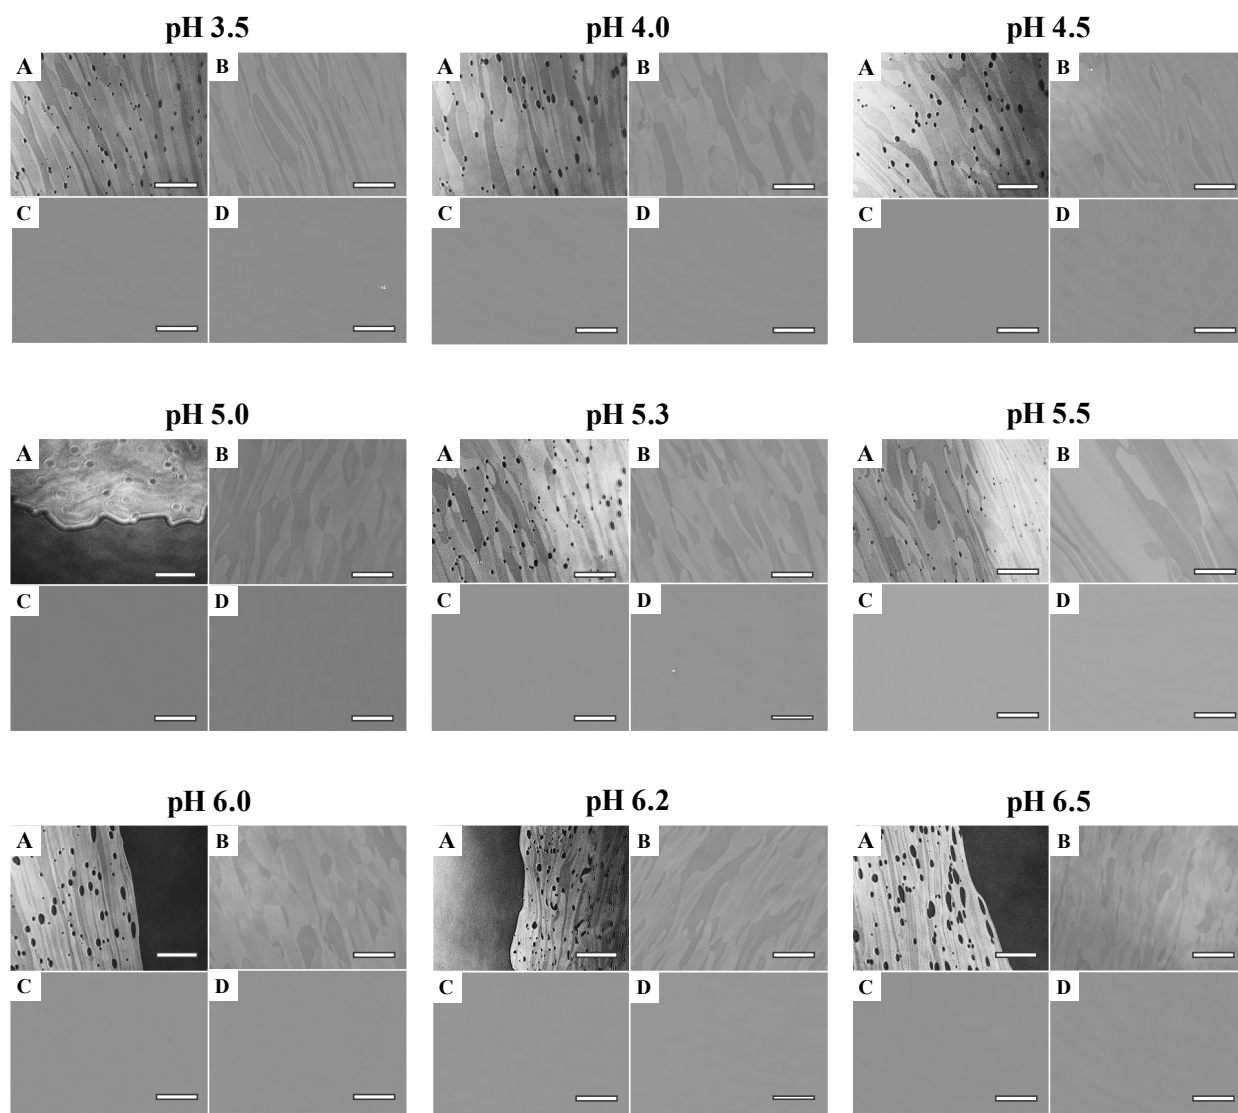

Figure S1. BAM images of AA monolayer formed on plain water subphase at incremental pH conditions across pH range. Each set of images is of the same monolayer at increasing surface pressures. For each set, individual images correspond to (A) 0.25 mN/m, (B) 10 mN/m, (C) 30 mN/m, and (D) 50 mN/m. Scale bars represent 100  $\mu\text{m}$ .

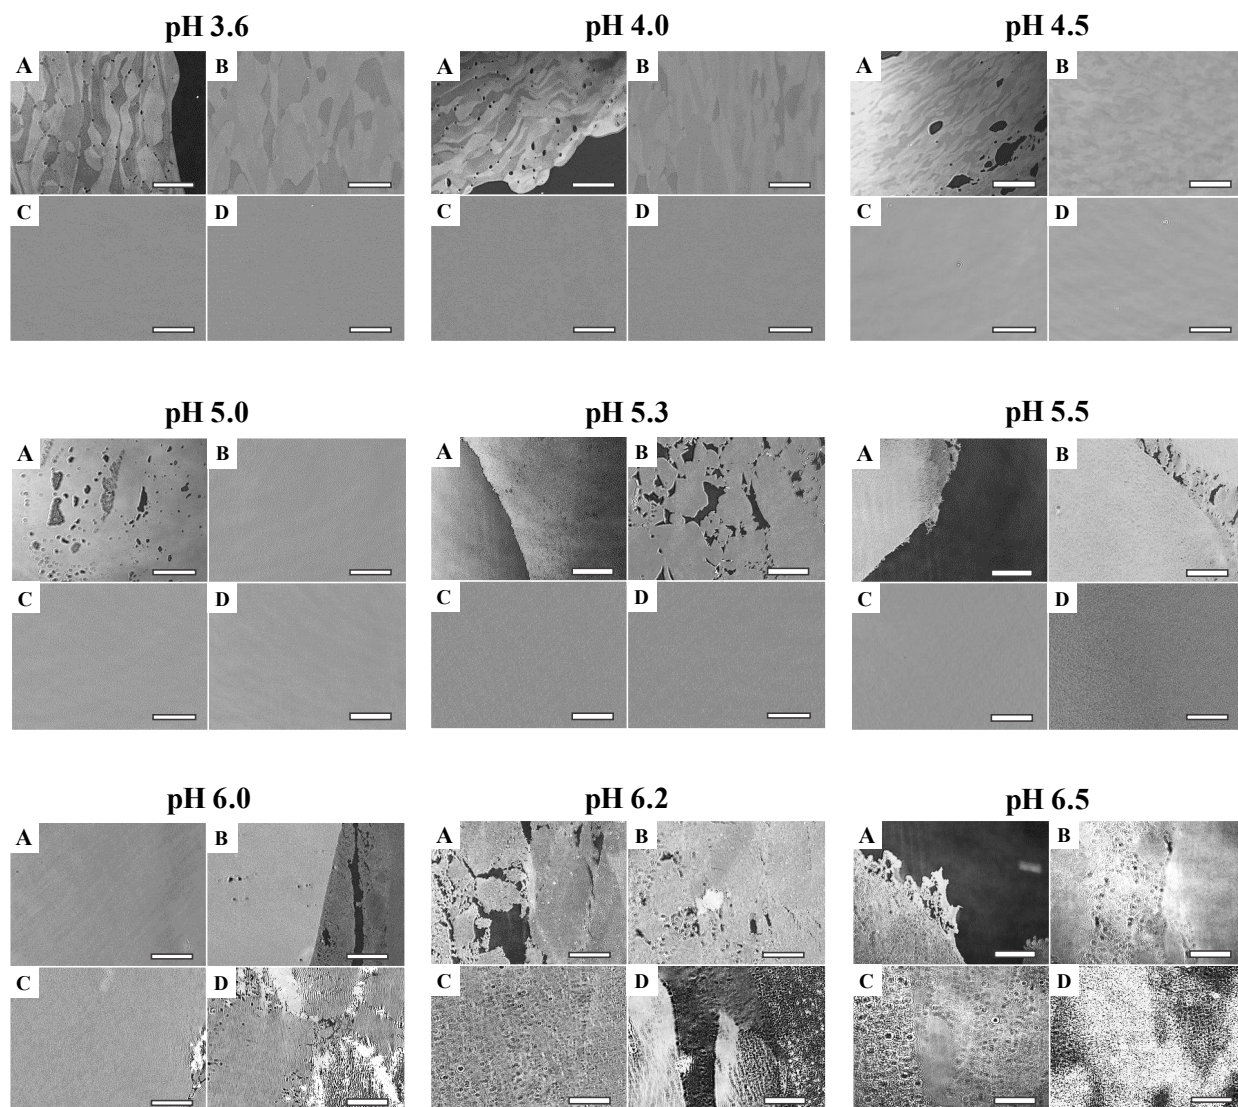

Figure S2. BAM images of AA monolayer formed on 1 mM  $\text{Cu}^{2+}$  water subphase at incremental pH conditions across pH range. Each set of images is of the same monolayer at increasing surface pressures. For each set, individual images correspond to (A) 0.25 mN/m, (B) 10 mN/m, (C) 30 mN/m, and (D) 50 mN/m. Scale bars represent 100  $\mu\text{m}$ .

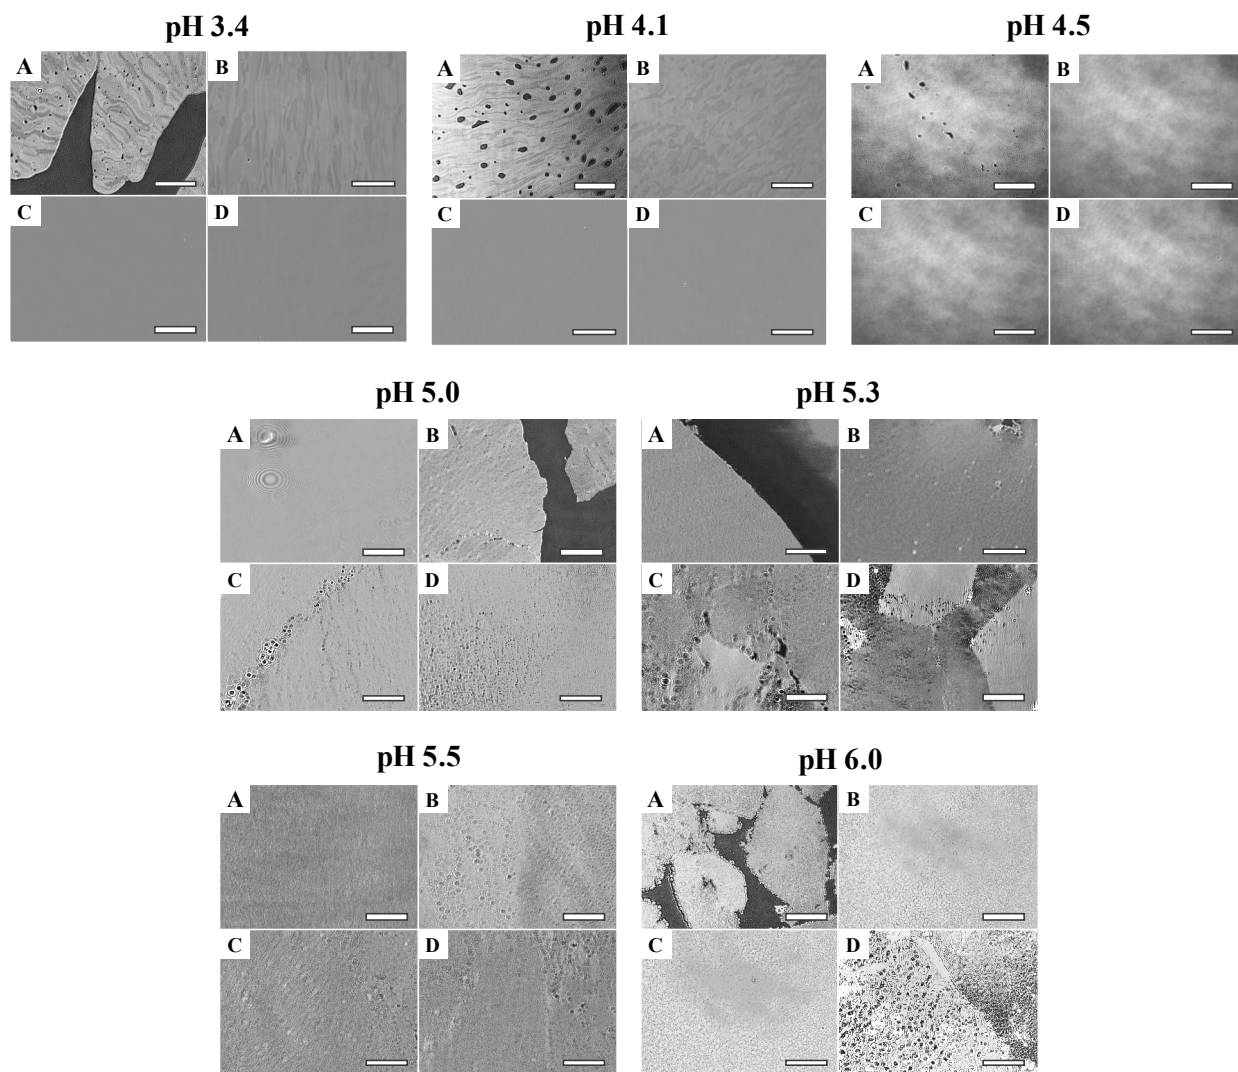

Figure S3. BAM images of AA monolayer formed on 5 mM  $\text{Cu}^{2+}$  water subphase at incremental pH conditions across pH range. Each set of images is of the same monolayer at increasing surface pressures. For each set, individual images correspond to (A) 0.25 mN/m, (B) 10 mN/m, (C) 30 mN/m, and (D) 50 mN/m. Scale bars represent 100  $\mu\text{m}$ . Experiments for pH 6.2 and 6.5 subphases not possible due to the precipitation of  $\text{CuOH}_2$  as a result of the increased  $\text{Cu}^{2+}$  concentration.

## 2. Mathematical model workflow

For the mathematical model plots of the fractional amount of species present at the subphase surface at a given pH and  $\text{Cu}^{2+}$  concentration, the following reactions and corresponding equilibria expressions were used:

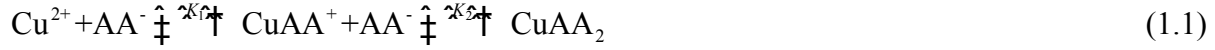

$$K_1 = \frac{[\text{CuAA}^+]}{[\text{Cu}^{2+}][\text{AA}^-]} \quad (1.2)$$

$$K_2 = \frac{[\text{CuAA}_2]}{[\text{CuAA}^+][\text{AA}^-]} \quad (1.3)$$

where  $K_1$  and  $K_2$  represent equilibrium constants for the formation of copper (II) monoacetate ( $\text{Cu}(\text{OAc})^+$ ) and copper (II) diacetate ( $\text{Cu}(\text{OAc})_2$ ) to represent the interactions of  $\text{Cu}^{2+}$  ions with the carboxylate headgroups of the arachidate molecules. Literature values for  $K_1$  and  $K_2$  were used ( $K_1 = 140$ ;  $K_2 = 11$ );<sup>1</sup>

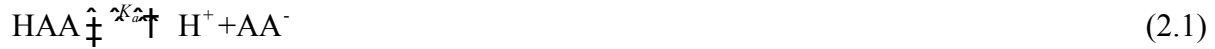

$$K_a = \frac{[\text{H}^+][\text{AA}^-]}{[\text{HAA}]} \quad (2.2)$$

where the literature value for the  $\text{pK}_a$  of arachidic acid was used ( $\text{pK}_a = 5.4$ );<sup>2</sup>

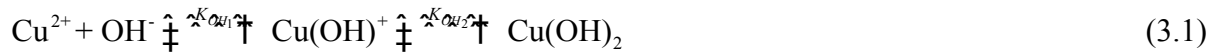

$$K_{OH_1} = \frac{[\text{CuOH}^+]}{[\text{Cu}^{2+}][\text{OH}^-]} \quad (3.2)$$

$$K_{OH_2} = \frac{[\text{Cu}(\text{OH})_2]}{[\text{CuOH}^+][\text{OH}^-]} \quad (3.3)$$

where the  $K_{sp}$  for copper (II) hydroxide ( $2 \times 10^{-20}$ )<sup>1</sup> was used as the product of  $K_{OH_1}$  and  $K_{OH_2}$ . Using this plus the expression for the dissociation of water molecules

$$K_w = [\text{H}^+][\text{OH}^-] \quad (4)$$

an expression for the concentration of free  $\text{Cu}^{2+}$  ions in the subphase was derived:

$$[\text{Cu}^{2+}] = \frac{C_{\text{Cu}} \frac{K_{sp}}{K_w^2} [\text{H}^+]^2}{1 + \frac{K_{sp}}{K_w^2} [\text{H}^+]^2} \quad (5)$$

Among the variables in Eqs. 1.2 – 5, the independent variables are  $[H^+]$  (pH) and  $[Cu^{2+}]$  (subphase concentration), and the dependent variables are  $[HAA]$ ,  $[AA^-]$ ,  $[CuAA^+]$ , and  $[CuAA_2]$ .

Rearranging the above equilibria expressions to solve for each of the dependent variables and assigning each one an arbitrary variable, we get:

$$[AA^-] = \Phi_1 = \frac{K_a[HAA]}{[H^+]} \quad (6)$$

$$[CuAA^+] = \Phi_2 = K_1[Cu^{2+}][AA^-] \quad (7)$$

$$[CuAA_2] = \Phi_3 = K_2[CuAA^+][AA^-] \quad (8)$$

$$[HAA] = 1 - \Phi_1 - \Phi_2 - \Phi_3 \quad (9)$$

Substituting Eq. 7 into Eq. 8, we get:

$$[CuAA_2] = \Phi_3 = K_1K_2[Cu^{2+}][AA^-]^2 \quad (10)$$

Replacing the  $[HAA]$  variables with the equivalent variables defined in Eq. 8 and all  $[AA^-]$  species with  $\Phi_1$ , the four dependent variables become:

$$[HAA] = 1 - \Phi_1 - \Phi_2 - \Phi_3 \quad (9)$$

$$[AA^-] = \Phi_1 = \frac{K_a}{[H^+]}(1 - \Phi_1 - \Phi_2 - \Phi_3) \quad (11)$$

$$[CuAA^+] = \Phi_2 = K_1[Cu^{2+}]\Phi_1 \quad (12)$$

$$[CuAA_2] = \Phi_3 = K_1K_2[Cu^{2+}]\Phi_1^2 \quad (13)$$

Putting all of the unknown variables in terms of  $\Phi_1$ , the expression for  $[AA^-]$  becomes

$$[AA^-] = \Phi_1 = \frac{K_a}{[H^+]}(1 - \Phi_1 - K_1[Cu^{2+}]\Phi_1 - K_1K_2[Cu^{2+}]\Phi_1^2) \quad (14.1)$$

Distributing the  $\frac{K_a}{[H^+]}$  term across the terms in parentheses and solving for zero, a polynomial expression is formed in which  $\Phi_1$  is the unknown variable:

$$0 = \frac{K_a}{[H^+]} - \left(1 + \frac{K_a}{[H^+]} + \frac{K_aK_1}{[H^+]}[Cu^{2+}]\right)\Phi_1 - \frac{K_aK_1K_2}{[H^+]}[Cu^{2+}]\Phi_1^2 \quad (14.2)$$

Using the quadratic equation, the value of  $\Phi_1$  can be solved for and used to solve for the values of  $[\text{CuAA}^+]$  and  $[\text{CuAA}_2]$  in Eqs. 12 and 13, respectively. Microsoft Excel was used to calculate the values of each species from pH 2 – 7.

### 3. Ellipsometry thickness data

| Subphase pH | Thickness (Å) |
|-------------|---------------|
| 3.5         | 26.1 ± 0.3    |
| 4.0         | 26.6 ± 0.5    |
| 4.5         | 27.1 ± 0.4    |
| 5.0         | 30.4 ± 0.8    |
| 5.3         | 29.8 ± 1.0    |
| 5.4         | 29.9 ± 0.4    |
| 6.0         | 31.8 ± 0.6    |
| 6.2         | 31.9 ± 0.6    |
| 6.4         | 33.4 ± 0.4    |

Table S1. Numerical ellipsometric thickness data for AA films formed on 1 mM Cu<sup>2+</sup> subphase at each pH and deposited at the solid phase. Thickness values are averages of 20 individual measurements. Errors reported are standard deviations.

| Subphase pH | Thickness (Å) |
|-------------|---------------|
| 3.6         | 24.2 ± 0.8    |
| 4.0         | 26.2 ± 0.3    |
| 4.6         | 27.4 ± 0.4    |
| 5.1         | 28.7 ± 1.0    |
| 5.4         | 28.4 ± 0.3    |
| 5.6         | 28.4 ± 0.4    |
| 6.0         | 29.0 ± 0.4    |
| 6.2         | 29.3 ± 0.7    |
| 6.5         | 31.3 ± 0.6    |

Table S2. Numerical ellipsometric thickness data for AA films formed on 1 mM Cu<sup>2+</sup> subphase at each pH and deposited at surface pressures indicative of a typical collapsed film. Thickness values are averages of 20 individual measurements. Errors reported are standard deviations.



## References

1. Skoog, D. A.; West, D. M. *Fundamentals of Analytical Chemistry*. 3<sup>rd</sup> ed. ed.; Holt, Rinehart and Winston: New York, 1963.
2. Kurnaz, M. L.; Schwartz, D. K. Morphology of Microphase Separation in Arachidic Acid-Cadmium Arachidate Langmuir-Blodgett Multilayers. *J. Phys. Chem.* **1996**, *100*, 11113-11119.
